# Supplementary material for: Dependence measures for non-cigarette tobacco products within the context of the global epidemic: a systematic review
Source: HighWire-hosted journal article supplement (doi:10.1136/tobaccocontrol-2012-050641), 2013-06-19
Supplement: tobaccocontrol-2012-050641supp_table2.pdf [file tobaccocontrol-2012-050641supp_table2.pdf]

**Table 2: Features of Seminal Tobacco Dependence Measures as Applied to Non-Cigarette Products and LMIC Contexts**

|                                                                                                                  | <b>Author</b>   | <b>Year</b> | <b>Central Definition of Dependence</b>                                                                                                                                                           | <b>Method(s) of Development</b>                                                                                 | <b>Number of Items</b> | <b>Features of Interest</b>                                                                                                                         | <b>Tobacco Product/s</b>                | <b>Countries</b>                                                                                | <b>Associated Articles</b>      |
|------------------------------------------------------------------------------------------------------------------|-----------------|-------------|---------------------------------------------------------------------------------------------------------------------------------------------------------------------------------------------------|-----------------------------------------------------------------------------------------------------------------|------------------------|-----------------------------------------------------------------------------------------------------------------------------------------------------|-----------------------------------------|-------------------------------------------------------------------------------------------------|---------------------------------|
| <b>Reason for Smoking Scale</b>                                                                                  | Horn & Waingrow | 1966        | Motivations for smoking are either positive or negative affect smoking, habit smoking, and psychological addiction smoking. Further research has added other dimensions.                          | Derived from Tomkins model(12-14)                                                                               | 23                     | stimulation; pleasure; sensorimotor; manipulation; habit; negative affect reduction; psychological addiction                                        | cigarettes                              | United States(13)                                                                               | (12-14,32,33,46)                |
| <b>Fagerström Tolerance Questionnaire / Fagerström Test for Nicotine Dependence / Heaviness of Smoking Index</b> | Fagerström      | 1978        | Compulsive use of tobacco: "Compulsive use includes a present state of being unable to quit or stay quit or a past state of difficulty in quitting characterized by withdrawal and/or craving"(5) | Developed to assess physical dependence to tobacco; eight items believed to reflect the principles of addiction | 8                      | time to first cigarette; nicotine yield; inhaling or not; number of cigarette smoked per day; difficulty abstaining from behavior; smoking when ill | cigarettes, smokeless tobacco(29,50,53) | Spain(34); Japan(35); Argentina(42); France(36); Korea(37); Turkey(38); China(39,40); Italy(41) | (24,29,34-43,51,53)(5,27,28,50) |

|                                           |                                              |      |                                                                                                                                                                                                                                 |                                                                                                                                                                                                                                          |    |                                                                                                                                                                                                                                       |                                      |                                                                   |               |
|-------------------------------------------|----------------------------------------------|------|---------------------------------------------------------------------------------------------------------------------------------------------------------------------------------------------------------------------------------|------------------------------------------------------------------------------------------------------------------------------------------------------------------------------------------------------------------------------------------|----|---------------------------------------------------------------------------------------------------------------------------------------------------------------------------------------------------------------------------------------|--------------------------------------|-------------------------------------------------------------------|---------------|
| <b>Diagnostic and Statistical Manual</b>  | American Psychiatric Association [DSM-IV-TR] | 2000 | A maladaptive pattern of substance use, leading to clinically significant impairment or distress. Specification needed of "with physiologic dependence" (i.e. tolerance and withdrawal) or "without physiologic dependence"(52) | Minor modifications of DSM criteria for alcoholism for the 3rd version of the DSM; little evidence of the assessment of validity prior to publishing DSM-ND criteria(54)                                                                 | 7  | tolerance; withdrawal; using/engaging in behavior more than intended; difficulty controlling use/behavior; spending a great deal of time (obtaining or using nicotine); giving up other activities; using/behaving despite harm       | all substances                       | United States(52)                                                 | (24,51,52,54) |
| <b>Hooked On Nicotine Checklist</b>       | DiFranza et al.                              | 2002 | Individual's loss of autonomy over tobacco use: possible through differing mechanisms (neuropharmacological, psychological, and/or behavioral); onset of dependence begins the moment autonomy is lost                          | Developed using three addiction theories as basis: self-medication, negative reinforcement; incentive-sensitization; evaluation of checklist occurred through a prospective study with adolescents; focus groups showed content validity | 10 | inability to quit; feeling addicted; strong cravings; difficulty in abstaining in places where smoking is not allowed; when abstaining: difficulties concentrating, irritability, strong need or urge, nervous, restlessness, anxious | cigarettes, smokeless tobacco(10)    | United States(4,31,49,55-57); Taiwan (Chinese)(39); Argentina(42) | (10,42)       |
| <b>Nicotine Dependence Syndrome Scale</b> | Shiffman, Waters, & Hickcox                  | 2004 | Edwards and Gross syndromal conceptualization of dependence (multi-dimensional)                                                                                                                                                 | initial items developed from conception of dependence for alcohol; focus groups were conducted to discuss experience of dependence; upon expert review, final survey items were re-tested among focus group participants                 | 23 | restlessness, irritability, cravings, loss of control, avoiding places where smoking is not permitted/acceptable, tolerance, regularity of smoking, smoking upon waking                                                               | cigarettes, specialty cigarettes(63) | United States(17,63); Finland(44); Spain(45)                      | (44,45,63)    |

|                                                                                             |                             |             |                                                                                                                                                            |                                                                                                                                                                                                                                                                                              |           |                                                                                                                                                                                                                                                                                                                                             |                   |                                       |                         |
|---------------------------------------------------------------------------------------------|-----------------------------|-------------|------------------------------------------------------------------------------------------------------------------------------------------------------------|----------------------------------------------------------------------------------------------------------------------------------------------------------------------------------------------------------------------------------------------------------------------------------------------|-----------|---------------------------------------------------------------------------------------------------------------------------------------------------------------------------------------------------------------------------------------------------------------------------------------------------------------------------------------------|-------------------|---------------------------------------|-------------------------|
| <p style="text-align: center;"><b>Wisconsin Inventory of Smoking Dependence Motives</b></p> | <p>Piper et al.</p>         | <p>2004</p> | <p>Dependence is multifactorial; define dependence on the basis of motivations as indicators of the "underlying latent variable of tobacco dependence"</p> | <p>Review of literature to identify 13 different motives for drug use behavior, experts evaluated these motives and domains were revised; items were written corresponding to the domains</p>                                                                                                | <p>68</p> | <p>affiliative attachment; automaticity; behavioral choice-melioration; cognitive enhancement; craving; cue exposure-associative process; loss of control; negative reinforcement; positive reinforcement; social environmental goods; taste and sensory properties; tolerance; weight control</p>                                          | <p>cigarettes</p> | <p>United States(25); Hungary(47)</p> | <p>(23,32,33,46,47)</p> |
| <p style="text-align: center;"><b>Lebanon Waterpipe Dependence Scale</b></p>                | <p>Salameh, Waked, Aoun</p> | <p>2008</p> | <p>Psychological and physical effects of nicotine</p>                                                                                                      | <p>15 items were taken from the FTND and DSM-IV and adapted while 6 items were added to cover social and psychological dimensions; scale validated and cross validated through face to face and phone interviews, as well as CO and salivary cotinine levels with three separate samples</p> | <p>11</p> | <p>times able to stop water for &gt;7 days; percent of income on waterpipe smoking; number of days without waterpipe; number of waterpipes smoked per week; smoking waterpipe to relax or improve morale; smoking waterpipe when ill; smoking alone; not eating for waterpipe; waterpipe smoking for pleasure; smoking to please others</p> | <p>waterpipe</p>  | <p>Lebanon(24)</p>                    | <p>(24,59)</p>          |

|                                                    |                                       |      |                                                                                                                                                                                                                     |                                                                                                                                                                                                                                                                |    |                                                                                                                                                                                                                                                                                                                  |                                   |                                              |            |
|----------------------------------------------------|---------------------------------------|------|---------------------------------------------------------------------------------------------------------------------------------------------------------------------------------------------------------------------|----------------------------------------------------------------------------------------------------------------------------------------------------------------------------------------------------------------------------------------------------------------|----|------------------------------------------------------------------------------------------------------------------------------------------------------------------------------------------------------------------------------------------------------------------------------------------------------------------|-----------------------------------|----------------------------------------------|------------|
| <b>Autonomy Over Smoking Scale</b>                 | DiFranza, Wellman, Sanouri, Sabiston  | 2009 | Loss of autonomy indicates intrinsic obstacles to cessation; individual cannot quit smoking without effort                                                                                                          | HONC with the added assessment of nicotine withdrawal, cue-induced craving, and physiological dependence; 30 candidate items generated following review of other instruments; interviews and focus groups conducted; 12 items selected for adult field testing | 12 | withdrawal: impatience, urges to smoke, lose temper, nervous/anxious; rely: to focus attention, to take mind off being bored, to deal with stress; "I would go crazy if I couldn't smoke"; crave: when feeling stressed, when seeing others smoke, when smelling smoke, after eating                             | cigarettes, smokeless tobacco(10) | United States(16); Germany(49);Argentina(42) | (10,42,49) |
| <b>Self-Administered Nicotine-Dependence Scale</b> | Davis et al.                          | 1994 | Dependence manifests along the following domains: (1) loss of control; (2) consequences of use; (3) social skills deficit; (4) self-efficacy; (5) social support for smoking; and (6) concern for healthy lifestyle | Relied on clinical experiences, research and theorizing to develop items concerning chemical dependence, evaluated 79-item experimental questionnaire                                                                                                          | 32 | questionnaire items covered the following domains: "(1) loss of control; (2) consequences of use; (3) social skills deficit; (4) self-efficacy; (5) social support for smoking; and (6) concern for healthy lifestyle                                                                                            | cigarettes                        | United States(20)                            |            |
| <b>Tobacco Dependence Screener</b>                 | Kawakami, Takatsuka, Inaba, & Shimizu | 1999 | "Tobacco/nicotine dependence is defined as a cluster of cognitive, behavioral, and physiological symptoms for which the individual attributes use of tobacco despite significant tobacco-related problems"(55)      | Used selection of 10 abbreviated questions from tobacco use section of the WHO-CIDI, the DSM-III and DSM-IV.                                                                                                                                                   | 10 | smoking more than he/she intended to; desire to quit; unsuccessful effort to quit; craving; withdrawal symptoms; smoking to avoid withdrawal symptoms; smoking despite illness; smoking despite health problems and/or mental problems; feeling dependent on tobacco; giving up important activities for smoking | cigarettes                        | Japan(23)                                    |            |

|                                                        |                                                    |      |                                                                                                                                          |                                                                                                                                                                                                                                                                                                              |                                    |                                                                                                                                                                                                                                                                        |            |                                                   |  |
|--------------------------------------------------------|----------------------------------------------------|------|------------------------------------------------------------------------------------------------------------------------------------------|--------------------------------------------------------------------------------------------------------------------------------------------------------------------------------------------------------------------------------------------------------------------------------------------------------------|------------------------------------|------------------------------------------------------------------------------------------------------------------------------------------------------------------------------------------------------------------------------------------------------------------------|------------|---------------------------------------------------|--|
| <b>Cigarette Dependence Scale</b>                      | Etter, Le Houezec, & Perneger                      | 2003 | Use DSM-IV and ICD-10 definitions of dependence                                                                                          | Qualitative surveys informed scale development with current and former smokers in addition to DSM and ICD-10 definitions of tobacco dependence, after field testing 153 items with two adult populations, 114 items were decided upon for preliminary testing, items were then eliminated to reduce this set | 12 (5 item version also available) | self-rated dependence; time to first cigarette; smoke too much; always having cigarettes; urge to smoke every few hours, quitting would be difficult; smoke despite risks, and more                                                                                    | cigarettes | Switzerland(18, 30); France(30)                   |  |
| <b>Glover-Nilsson Smoking Behavioral Questionnaire</b> | Glover, Nilsson, Westin, Glover, Laffin, & Persson | 2005 | Questionnaire created in order to assess the extent to which behavioral patterns influence smoking dependence                            | Four tobacco treatment experts developed questionnaire items independently resulting in 39 items; panel then asked to eliminate duplicate items; the remaining 18 items; items were further reduced using data from 8 tobacco research trial conducted in Spain, Sweden, Switzerland, and the United States. | 11                                 | importance of habit; cigarette manipulation; attempts to keep mouth busy to prevent smoking; using cigarette as reward; difficulty concentrating without cigarette; environmental cue; lighting up without craving; safety/confidence from holding cigarette, and more | cigarettes | Spain, Sweden, Switzerland, the United States(22) |  |
| <b>Kano Test for Social Nicotine Dependence</b>        | Yoshii et al.                                      | 2006 | Social nicotine dependence as psychological dependence typified by a distorted cognition of smoking; can apply to smokers or non-smokers | Developed by a working group of 20 members; questions and point allocation discussed over e-mail mailing list; first version tested with smokers, ex-smokers and non-smokers and edited                                                                                                                      | 10                                 | beliefs around smoking and whether or not smoking is an acceptable behavior (denying ill effects, rationalization/justification of smoking as cultural/social behavior)                                                                                                | cigarettes | Japan(19)                                         |  |

|                                    |             |      |                                                                        |                                                                                                                                                                                                                      |    |                                                                                                                                                                                                                                                                                                                  |            |                   |  |
|------------------------------------|-------------|------|------------------------------------------------------------------------|----------------------------------------------------------------------------------------------------------------------------------------------------------------------------------------------------------------------|----|------------------------------------------------------------------------------------------------------------------------------------------------------------------------------------------------------------------------------------------------------------------------------------------------------------------|------------|-------------------|--|
|                                    |             |      |                                                                        | to improve questionnaire                                                                                                                                                                                             |    |                                                                                                                                                                                                                                                                                                                  |            |                   |  |
| <b>DSM V Nicotine Use Disorder</b> | Chung et al | 2012 | Combines concepts of substance abuse and dependence as well as craving | Combination of DSM IV substance abuse criteria, DSM IV dependence criteria and a new craving criterion. Proposed criteria seen to represent a single dimension. Proposed diagnostic threshold: two (of 11) symptoms. | 11 | Substance abuse criteria: role obligations, hazardous use, interpersonal problems; Dependence criteria: tolerance, withdrawal, using more than intended, difficulty controlling use, much time spent obtaining or using nicotine, giving up other activities, using despite harm; Craving (strong desire to use) | cigarettes | United States(15) |  |
